# Supplementary material for: Identifying weather patterns affecting household date palm sap consumption in Bangladesh, 2013–2016
Source: PubMed Central journal article supplement (PMC11578510; doi:10.1371/journal.pone.0313904), 2024-11-20

A

Average visibility Nov. - Apr., 2013 – 2016

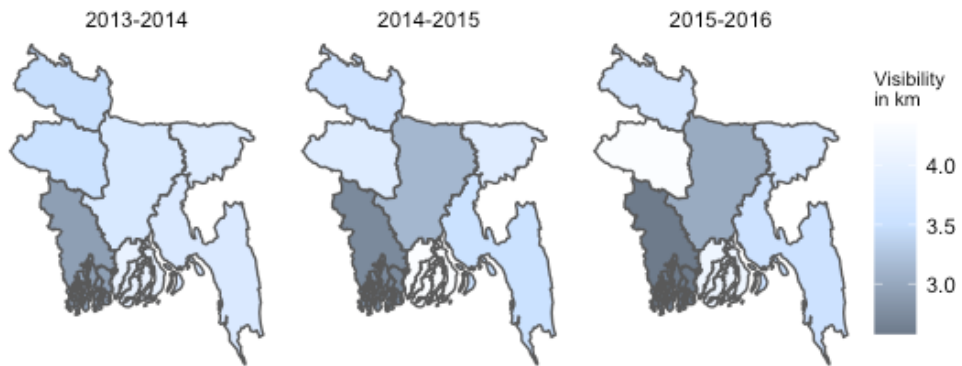

B

Average relative humidity Nov. - Apr., 2013 – 2016

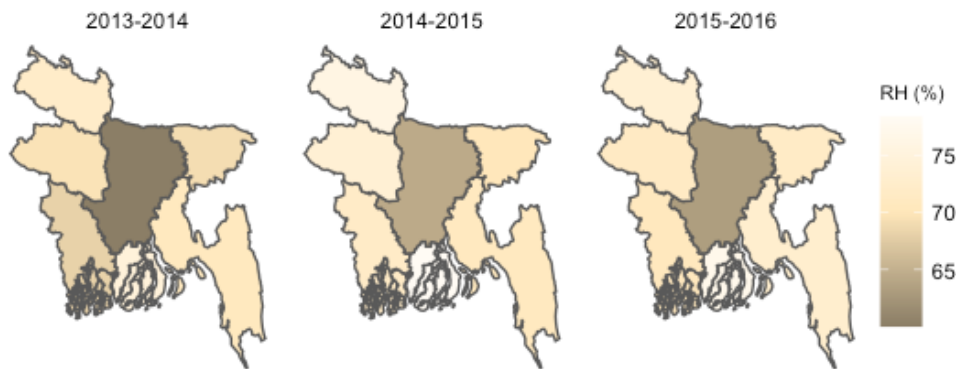

Supplement: pone.0313904.s003.pdf [file pone.0313904.s003.pdf]
