# Supplementary material for: Identifying weather patterns affecting household date palm sap consumption in Bangladesh, 2013–2016
Source: PubMed Central journal article supplement (PMC11578510; doi:10.1371/journal.pone.0313904), 2024-11-20

A

ROC Curve of predictors Month, Location & 30-day Rolling Averages of Minimum Temperature and Cum. Precipitation (AUC = 0.7859)

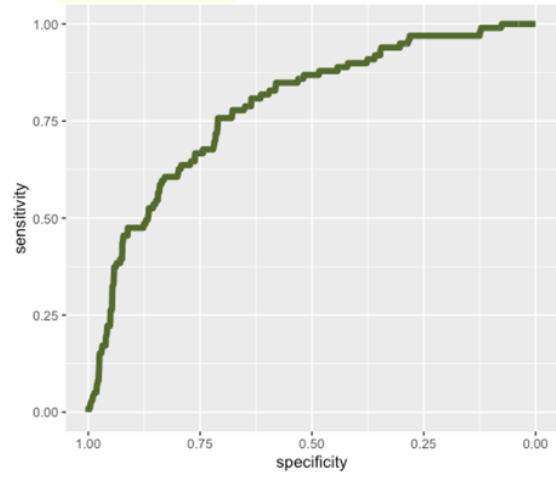

B

ROC Curve of predictors Month, Location & Season (AUC = 0.7904)

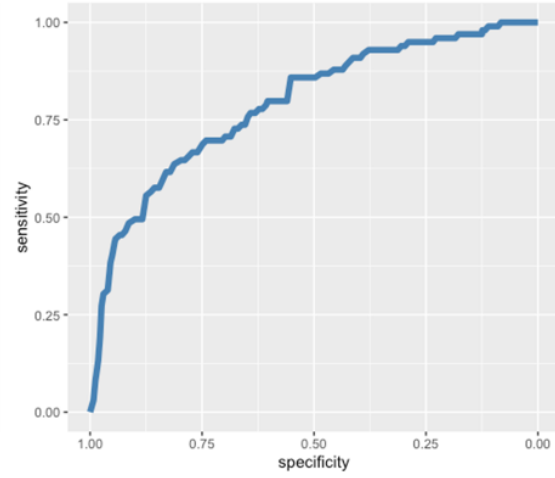

C

ROC Curve of predictors Month, Location, Weather, & Season (AUC = 0.79)

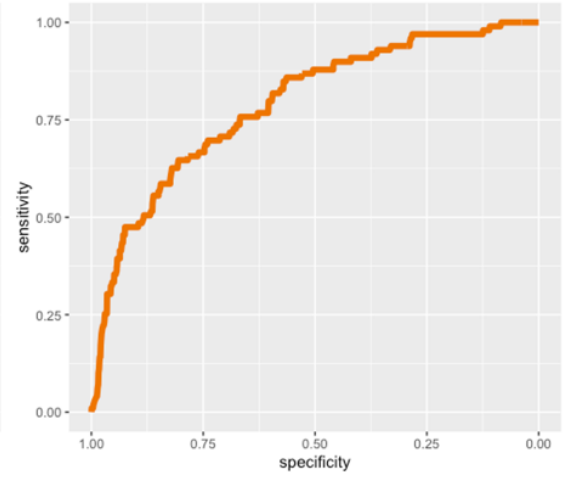

Supplement: pone.0313904.s004.pdf [file pone.0313904.s004.pdf]
