# Supplementary material for: Identifying weather patterns affecting household date palm sap consumption in Bangladesh, 2013–2016
Source: PubMed Central journal article supplement (PMC11578510; doi:10.1371/journal.pone.0313904), 2024-11-20
Supplement: pone.0313904.s005.pdf [file pone.0313904.s005.pdf]

**Table S1:**  $\chi^2$  Likelihood ratio tests to determine contribution of extended covariates to specified null models for household date palm sap consumption in the past month in responses given November- April 2013-2016 in Bangladesh.

| <b>Null</b>                             | <b>Extended</b>               | <b>DF</b> | <b>LR <math>\chi^2</math></b> |
|-----------------------------------------|-------------------------------|-----------|-------------------------------|
| month + division                        | + <b>season</b>               | 1         | 56.36 ***                     |
| month + division + season               | + <b>cat_mintemp</b>          | 1         | 1.31                          |
| month + division + season               | + <b>SMA_mintemp</b>          | 1         | 7.74 **                       |
| month + division + season               | + <b>cat_precip</b>           | 1         | 14.69 ***                     |
| month + division + season               | + <b>SMA_precip</b>           | 1         | 5.15 *                        |
| month + division + season + SMA_mintemp | + <b>cat_precip</b>           | 1         | 13.75 ***                     |
| month + division + season + SMA_mintemp | + <b>SMA_precip</b>           | 1         | 8.00 **                       |
| month + division + season + cat_precip  | + <b>SMA_mintemp</b>          | 1         | 6.80 **                       |
| month + division + season + SMA_precip  | + <b>SMA_mintemp</b>          | 1         | 10.59 **                      |
| month + division + season               | + <b>cat_visibility</b>       | 1         | 0.23                          |
| month + division + season               | + <b>SMA_visibility</b>       | 1         | 2.86                          |
| month + division + season               | + <b>cat_relativehumidity</b> | 1         | 1.13                          |
| month + division + season               | + <b>SMA_relativehumidity</b> | 1         | 2.35                          |

\*= significant at  $p < 0.05$

\*\* = significant at  $p < 0.01$

\*\*\* = significant at  $p < 0.001$

cat: categorical monthly average of daily values for the weather variable within the division

SMA: simple moving average of daily values for the weather variable in the division within the 30 days preceding the response
