# Supplementary material for: Identifying weather patterns affecting household date palm sap consumption in Bangladesh, 2013–2016
Source: PubMed Central journal article supplement (PMC11578510; doi:10.1371/journal.pone.0313904), 2024-11-20
Supplement: pone.0313904.s006.pdf [file pone.0313904.s006.pdf]

**Table S2:** Comparison of candidate logistic models of specified variables on date palm sap consumption using AICc

| <b>Covariates</b>                                    | <b>K</b> | <b>AICc</b>    | <b>Δ AICc</b> | <b>Log-Likelihood</b> |
|------------------------------------------------------|----------|----------------|---------------|-----------------------|
| month + division + season + SMA_mintemp + SMA_precip | 16       | <b>2119.19</b> | -             | -1043.54              |
| month + division + season                            | 14       | <b>2130.91</b> | 11.71         | -1051.41              |
| month + division + SMA_mintemp + SMA_precip          | 14       | <b>2133.98</b> | 14.79         | -1052.95              |
| month + division                                     | 12       | <b>2183.25</b> | 64.46         | -1079.59              |

SMA: simple moving average of daily values for the weather variable in the division within the 30 days preceding the response
